# Supplementary material for: Global Comparison of Changes in the Number of Test-Positive Cases and Deaths by Coronavirus Infection (COVID-19) in the World
Source: Preprints.org preprint supplement (doi:10.20944/preprints202004.0374.v1), 2020-04-21
Supplement: Supplementary file 1 [file supplementary]

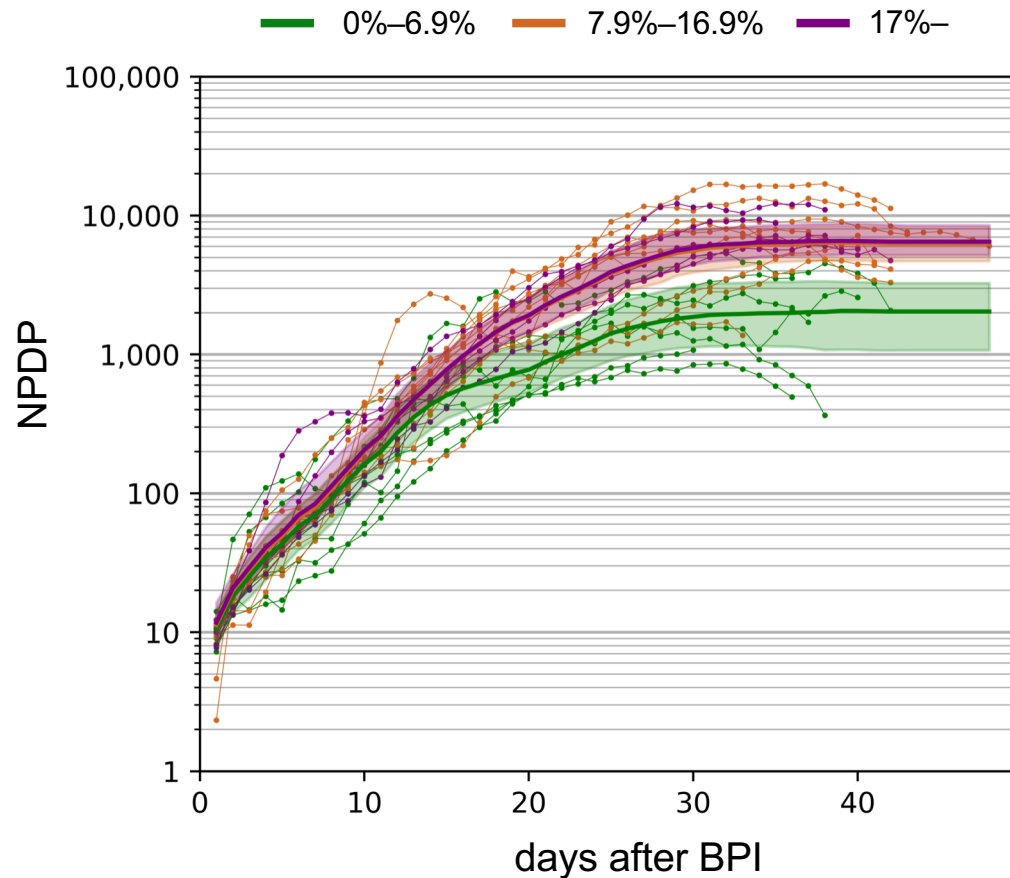

**0%–6.9%** Australia, Canada, Czech Republic, Finland, Greece, Norway, Poland

**7%–16.9%** Austria, Denmark, Germany, Ireland, Italy, Portugal, Romania, Spain, Sweden, Switzerland

**17%–** Belgium, France, Netherlands, United Kingdom, United States of America

**Supplemental Figure 1.** Estimation of the time course of NPDP after BPI classified by the positive rate of the PCR test. Each colored area represents 5 to 95% confidence interval of the median estimated by bootstrap analysis.
